# Supplementary material for: Exploring the bonding in alkaline earth halides AeX− (Ae = Be–Ba, X = F–I) from Fermi hole localization and QTAIM perspectives
Source: Royal Society of Chemistry journal article supplement (doi:10.1039/d4cp04332d), 2024-12-28
Supplement: d4cp04332d1.pdf [file d4cp04332d1.pdf]

# Exploring the Bonding in Alkaline Earth Halides AeX- (Ae=Be-Ba, X=F-I) from the Fermi Hole

## Localization and QAIM Perspectives

Luis Rincón,<sup>a</sup> Valeria Bedoya,<sup>a</sup> Luis E. Seijas,<sup>b</sup> Vladimir Rodríguez,<sup>c</sup> Cesar Zambrano,<sup>a</sup> and F. Javier Torres<sup>a\*</sup>

<sup>a</sup>*Grupo de Química Computacional y Teórica (QCT-USFQ), Departamento de Ingeniería Química, Universidad San Francisco de Quito, Diego de Robles y Vía Interoceánica, Quito 17-1200-841, Ecuador*

<sup>b</sup>*Escuela de Ingeniería Ciencia y Tecnología, Universidad del Rosario, Bogotá 11171, Colombia.*

<sup>c</sup>*Departamento de Matemática, Universidad San Francisco de Quito, Diego de Robles y Vía Interoceánica, Quito 17-1200-841, Ecuador*

**Figure S1:** DFT and CCSD(T) delocalization index computed for the bonds in (a) AeX<sup>-</sup> (Ae=Be-Ba, X=F) and (b) EX (E=B-Tl, X=F) systems.

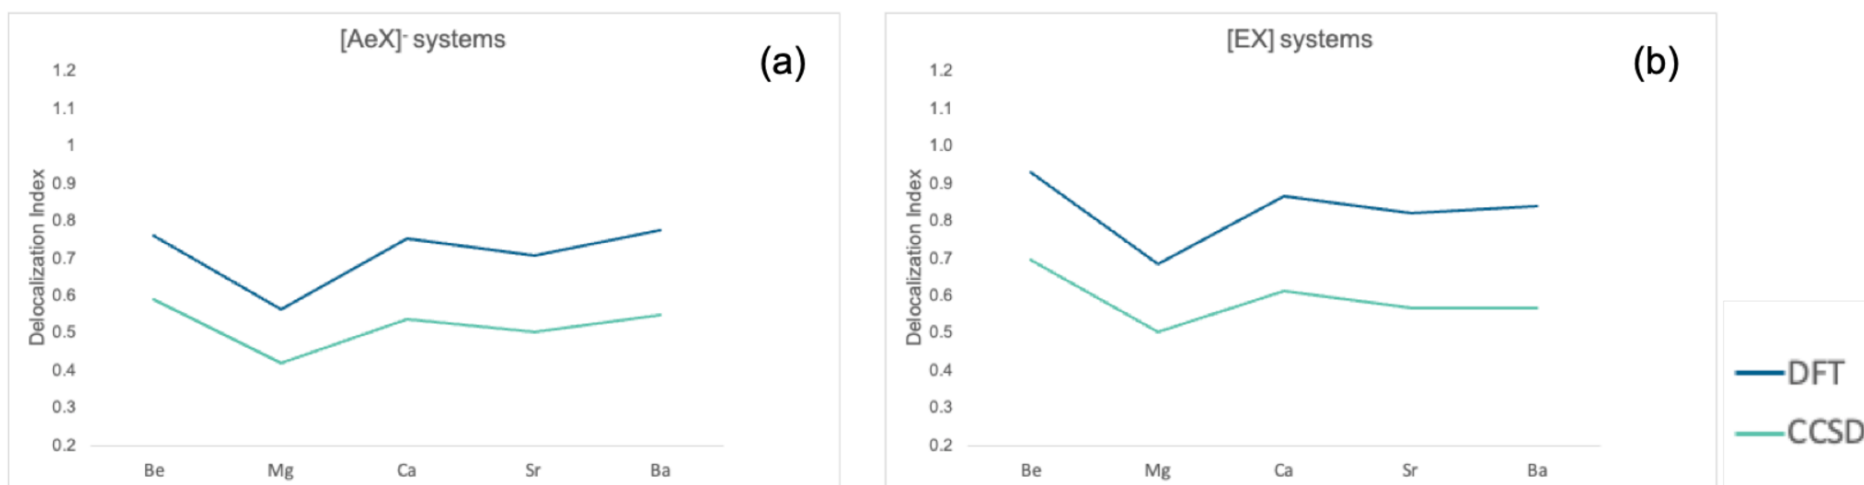

**Figure S2:** Comparison of the Fermi Hole Localization contours as obtained at the DFT and CCSD(T) levels for the  $AeX^-$  ( $Ae=Be-Ba$ ,  $X=F$ ) systems. Color scale values in bte.

DFT

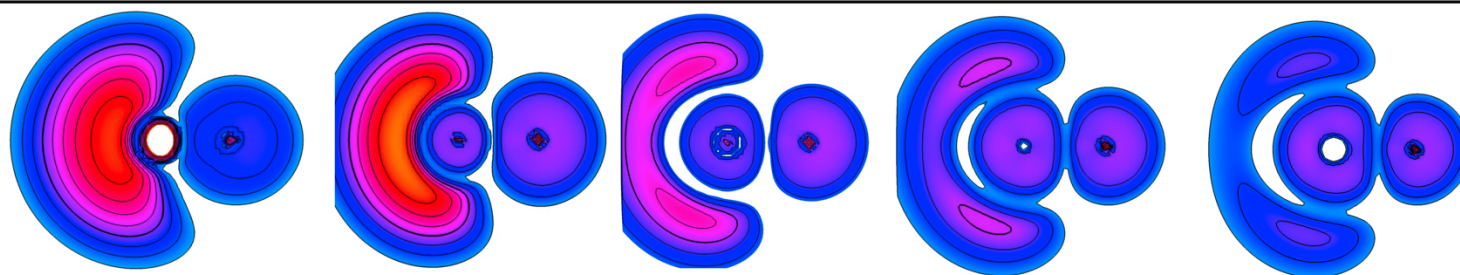

CCSD(T)

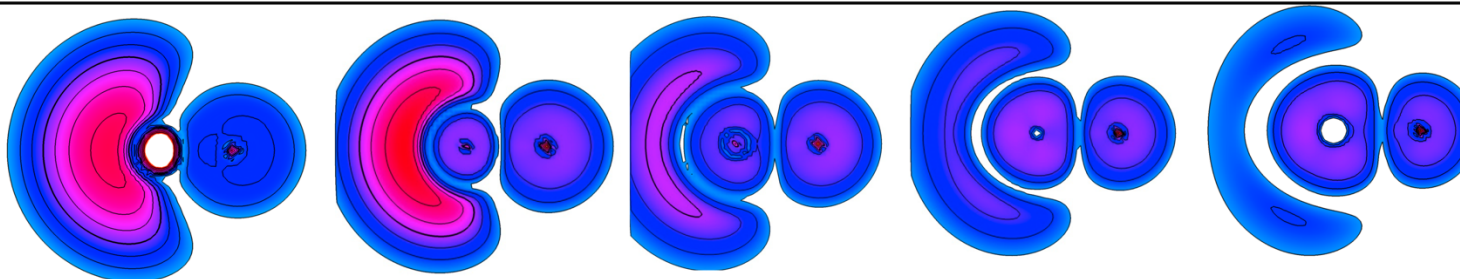

BeF<sup>-</sup>

MgF<sup>-</sup>

CaF<sup>-</sup>

SrF<sup>-</sup>

BaF<sup>-</sup>

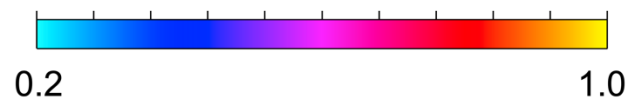

**Figure S3:** Comparison of the Fermi Hole Localization contours as obtained at the DFT and CCSD(T) levels for the EX (E=B-Tl, X=F) systems. Color scale values in bte.

DFT

---

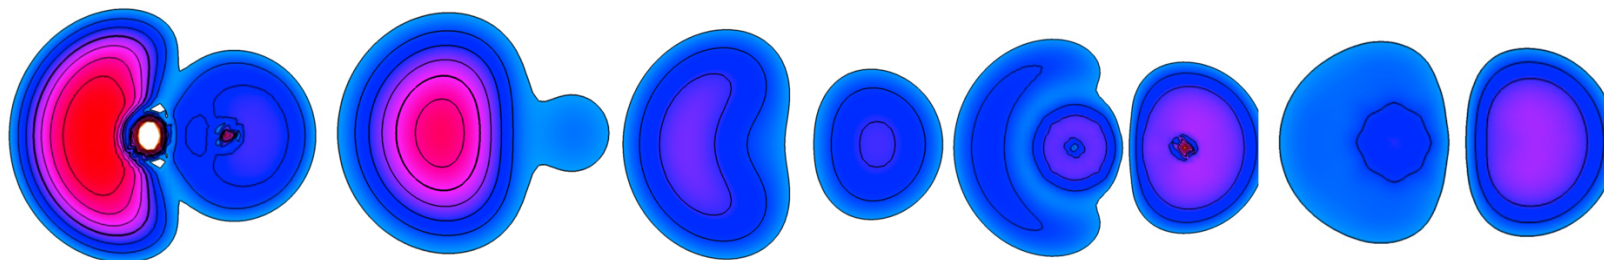

CCSD(T)

---

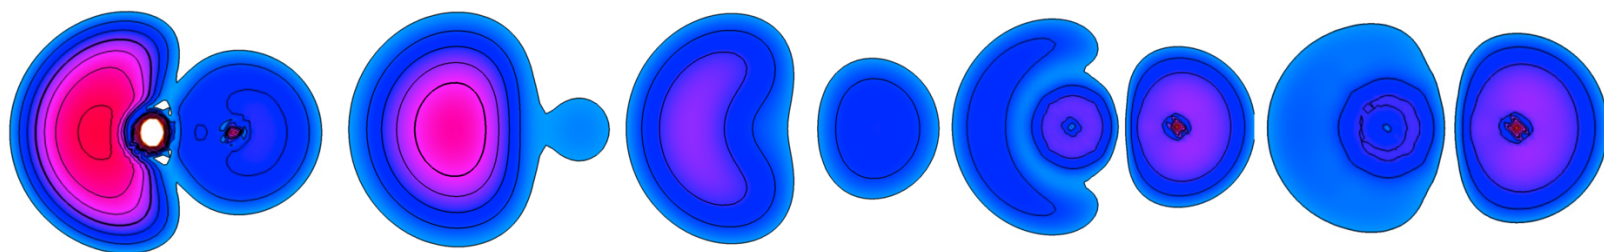

BF

AIF

GaF

InF

TlF

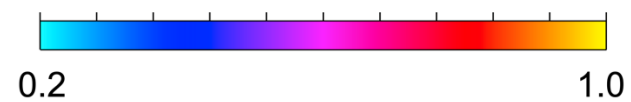

**Figure S4:** (a) Graphical representation of the Fermi hole localization (i.e., isovalue = 0.28125 bte) and (b) topological analysis obtained for the RhB molecule computed at the BP86/def2-QZVPP level of theory. The delocalization index has been also included in the figure as a value of reference.

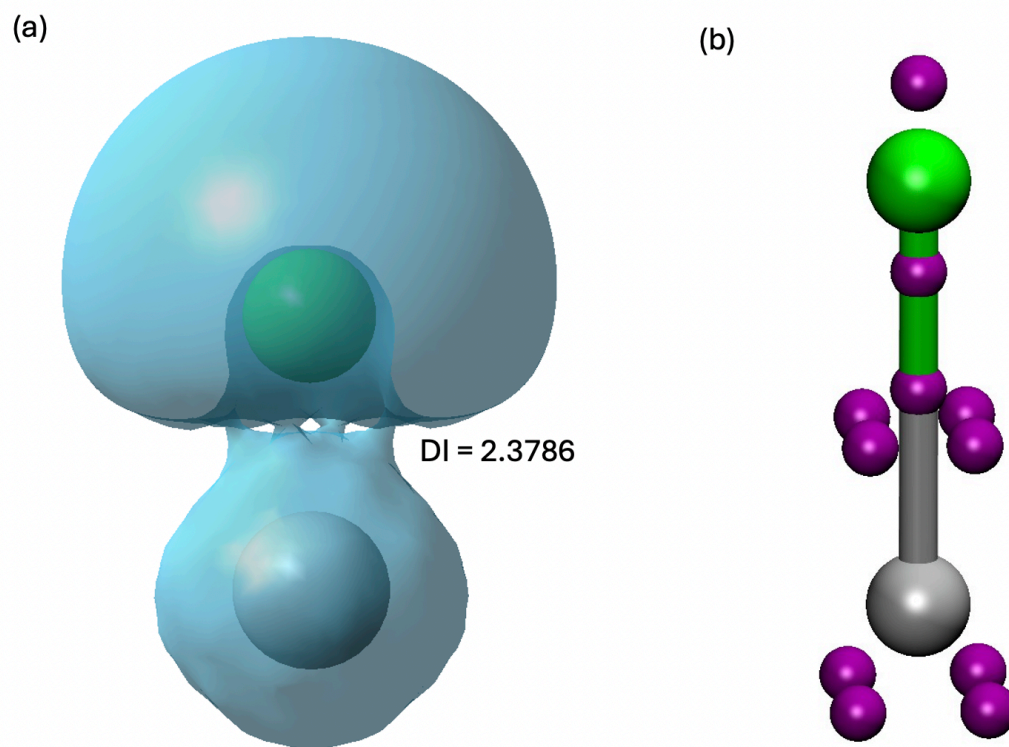

**Table S1:** Atomic partial charges ( $q$ ) for  $[\text{AeX}]^-$ , Ae = Be-Ba and X = F-I calculated at BP86/def2-QZVPP.

| [AeX]-  | QTAIM |       | Hirshfeld |       | CM5   |       |
|---------|-------|-------|-----------|-------|-------|-------|
|         | q(Ae) | q(X)  | q(Ae)     | q(X)  | q(Ae) | q(X)  |
| [BeF]-  | 0.05  | -1.05 | -0.65     | -0.35 | -0.50 | -0.50 |
| [BeCl]- | 0.05  | -1.05 | -0.60     | -0.40 | -0.51 | -0.49 |
| [BeBr]- | 0.03  | -1.03 | -0.55     | -0.44 | -0.49 | -0.51 |
| [BeI]-  | 0.01  | -1.01 | -0.48     | -0.52 | -0.44 | -0.55 |
| [MgF]-  | -0.01 | -0.99 | -0.51     | -0.49 | -0.41 | -0.59 |
| [MgCl]- | -0.02 | -0.98 | -0.45     | -0.55 | -0.41 | -0.59 |
| [MgBr]- | -0.02 | -0.98 | -0.43     | -0.57 | -0.40 | -0.60 |
| [MgI]-  | -0.04 | -0.96 | -0.38     | -0.62 | -0.37 | -0.62 |
| [CaF]-  | -0.03 | -0.97 | -0.55     | -0.45 | -0.40 | -0.59 |
| [CaCl]- | -0.03 | -0.97 | -0.52     | -0.48 | -0.45 | -0.55 |
| [CaBr]- | -0.10 | -0.90 | -0.51     | -0.49 | -0.46 | -0.53 |
| [CaI]-  | -0.10 | -0.90 | -0.49     | -0.51 | -0.46 | -0.54 |
| [SrF]-  | -0.11 | -0.89 | -0.53     | -0.47 | -0.36 | -0.63 |
| [SrCl]- | -0.09 | -0.91 | -0.49     | -0.51 | -0.41 | -0.59 |
| [SrBr]- | -0.09 | -0.91 | -0.48     | -0.52 | -0.43 | -0.57 |
| [SrI]-  | -0.09 | -0.91 | -0.46     | -0.54 | -0.43 | -0.57 |
| [BaF]-  | -0.16 | -0.84 | -0.55     | -0.45 | -0.36 | -0.63 |
| [BaCl]- | -0.12 | -0.88 | -0.51     | -0.48 | -0.43 | -0.57 |
| [BaBr]- | -0.13 | -0.87 | -0.51     | -0.49 | -0.51 | -0.49 |
| [BaI]-  | -0.12 | -0.88 | -0.49     | -0.51 | -0.47 | -0.54 |

**Table S2:** Electron Density Properties in [AeX]- , with Ae = Be-Ba and X = F-I calculated in BCP at BP86/def2-QZVPP.

| [AeX]-  | $\rho_{\text{BCP}}$ a.u. | $\nabla^2\rho_{\text{BCP}}$ a.u. | $ V_{\text{BCP}} /G_{\text{BCP}}$ | $H_{\text{BCP}}$ a.u. | C(Ae) a.u. | V(Ae) a.u. | B(Ae,X) a.u. | V(X) a.u. | C(X) a.u. |
|---------|--------------------------|----------------------------------|-----------------------------------|-----------------------|------------|------------|--------------|-----------|-----------|
| [BeF]-  | 0.1201                   | 1.0899                           | 1.0004                            | -0.0001               | 2.04       | 2.03       | 1.83         | 5.92      | 2.02      |
| [BeCl]- | 0.0630                   | 0.2603                           | 1.1644                            | -0.0128               | 2.03       | 2.01       | 1.60         | 6.29      | 10.03     |
| [BeBr]- | 0.0499                   | 0.1414                           | 1.2679                            | -0.0129               | 2.03       | 2.00       | 1.42         | 6.72      | 27.73     |
| [BeI]-  | 0.0382                   | 0.0403                           | 1.5720                            | -0.0135               | 2.03       | 1.99       | 1.13         | 5.36      | 46.06     |
| [MgF]-  | 0.0655                   | 0.5171                           | 0.9367                            | +0.0077               | 10.04      | 1.99       | 1.28         | 6.53      | 2.14      |
| [MgCl]- | 0.0336                   | 0.1448                           | 0.9823                            | +0.0006               | 10.04      | 1.96       | 1.23         | 6.69      | 10.02     |
| [MgBr]- | 0.0271                   | 0.0888                           | 1.0271                            | -0.0006               | 10.05      | 1.95       | 1.08         | 7.10      | 27.64     |
| [MgI]-  | 0.0209                   | 0.0414                           | 1.1432                            | -0.0017               | 10.03      | 1.95       | 0.79         | 7.53      | 44.35     |
| [CaF]-  | 0.0901                   | 0.4589                           | 1.0729                            | -0.0090               | 18.14      | 1.90       | 0.51         | 7.19      | 2.15      |
| [CaCl]- | 0.0477                   | 0.1550                           | 1.0794                            | -0.0033               | 18.13      | 1.88       | 1.03         | 6.82      | 10.00     |
| [CaBr]- | 0.0390                   | 0.1101                           | 1.0788                            | -0.0024               | 18.08      | 1.87       | 1.49         | 6.63      | 27.35     |
| [CaI]-  | 0.0295                   | 0.0680                           | 1.0876                            | -0.0016               | 18.09      | 1.96       | 1.73         | 6.54      | 44.46     |
| [SrF]-  | 0.0785                   | 0.3591                           | 1.0841                            | -0.0082               | 35.62      | 1.88       | 0.42         | 7.29      | 2.15      |
| [SrCl]- | 0.0418                   | 0.1282                           | 1.0704                            | -0.0024               | 35.35      | 1.86       | 0.04         | 7.82      | 10.02     |
| [SrBr]- | 0.0343                   | 0.0923                           | 1.0715                            | -0.0018               | 35.49      | 1.85       | 1.41         | 6.63      | 27.18     |
| [SrI]-  | 0.0262                   | 0.0581                           | 1.0830                            | -0.0013               | 35.55      | 1.85       | 1.73         | 6.54      | 44.22     |
| [BaF]-  | 0.0818                   | 0.2970                           | 1.1889                            | -0.0166               | 52.78      | 1.86       | 1.43         | 6.20      | 2.15      |
| [BaCl]- | 0.0443                   | 0.1163                           | 1.1320                            | -0.0044               | 52.74      | 1.84       | 1.03         | 6.80      | 10.00     |
| [BaBr]- | 0.0367                   | 0.0873                           | 1.1134                            | -0.0028               | 52.73      | 1.83       | 1.35         | 6.74      | 27.17     |
| [BaI]-  | 0.0285                   | 0.0580                           | 1.1021                            | -0.0016               | 52.85      | 1.78       | 1.71         | 6.60      | 44.21     |

**Note:** 'V', 'C', and 'B' indicate the average occupation numbers in the  $\chi_{\text{xc}}$  (Valence, Core, and Bonding) basins, respectively. ' $\rho_{\text{BCP}}$ ' denotes the electron density at the bond critical point. ' $\nabla^2\rho$ ' signifies the Laplacian evaluated at the bond critical point. ' $|V_{\text{BCP}}|/G_{\text{BCP}}$ ' represents the ratio of potential to kinetic energy density, also evaluated at the bond critical point.

**Table S3:** Atomic partial charges ( $q$ ) for EX, E=B-Tl and X = F-I calculated at BP86/def2-QZVPP.

| EX   | QTAIM |       | Hirshfeld |       | CM5   |       |
|------|-------|-------|-----------|-------|-------|-------|
|      | q(E)  | q(X)  | q(E)      | q(X)  | q(E)  | q(X)  |
| BF   | 0.88  | -0.88 | 0.05      | -0.05 | 0.00  | 0.00  |
| BCl  | 0.72  | -0.72 | -0.01     | 0.01  | -0.08 | 0.08  |
| BBr  | 0.57  | -0.57 | -0.01     | 0.01  | -0.10 | 0.10  |
| BI   | 0.21  | -0.21 | 0.00      | 0.00  | -0.09 | 0.09  |
| AlF  | 0.91  | -0.91 | 0.30      | -0.30 | 0.28  | -0.28 |
| AlCl | 0.83  | -0.83 | 0.24      | -0.24 | 0.21  | -0.21 |
| AlBr | 0.79  | -0.79 | 0.22      | -0.22 | 0.17  | -0.17 |
| AlI  | 0.73  | -0.73 | 0.21      | -0.21 | 0.16  | -0.16 |
| GaF  | 0.73  | -0.73 | 0.33      | -0.33 | 0.34  | -0.34 |
| GaCl | 0.63  | -0.63 | 0.28      | -0.28 | 0.27  | -0.27 |
| GaBr | 0.57  | -0.57 | 0.26      | -0.26 | 0.24  | -0.24 |
| GaI  | 0.50  | -0.50 | 0.24      | -0.24 | 0.21  | -0.21 |
| InF  | 0.74  | -0.74 | 0.38      | -0.38 | 0.41  | -0.41 |
| InCl | 0.64  | -0.64 | 0.34      | -0.34 | 0.34  | -0.34 |
| InBr | 0.60  | -0.60 | 0.31      | -0.31 | 0.31  | -0.31 |
| InI  | 0.53  | -0.53 | 0.29      | -0.29 | 0.27  | -0.27 |
| TlF  | 0.71  | -0.71 | 0.41      | -0.41 | 0.44  | -0.44 |
| TlCl | 0.62  | -0.62 | 0.38      | -0.38 | 0.39  | -0.39 |
| TlBr | 0.57  | -0.57 | 0.35      | -0.35 | 0.36  | -0.36 |
| TlI  | 0.51  | -0.51 | 0.33      | -0.33 | 0.33  | -0.33 |



**Table S4:** Electron Density Properties in EX systems, with E = B-Tl and X = F-I calculated in BCP at BP86/def2-QZVPP.

| EX   | $\rho_{\text{BCP}}$ a.u. | $\nabla^2\rho_{\text{BCP}}$ a.u. | $ V_{\text{BCP}} /G_{\text{BCP}}$ | $H_{\text{BCP}}$ a.u. | C(Ae) a.u. | V(Ae) a.u. | B(E,X) a.u. | V(X) a.u. | C(X) a.u. |
|------|--------------------------|----------------------------------|-----------------------------------|-----------------------|------------|------------|-------------|-----------|-----------|
| BF   | 0.2405                   | 1.3951                           | 1.3709                            | -0.2056               | 2.05       | 2.15       | 1.44        | 5.96      | 2.15      |
| BCl  | 0.1567                   | -0.0718                          | 2.1214                            | -0.1657               | 2.05       | 2.13       | 1.58        | 6.17      | 10.00     |
| BBr  | 0.1359                   | -0.2931                          | 3.0986                            | -0.1400               | 2.04       | 2.12       | 1.50        | 6.53      | 27.34     |
| BI   | 0.1118                   | -0.1446                          | 3.1931                            | -0.0665               | 2.04       | 2.10       | 1.46        | 6.71      | 44.25     |
| AlF  | 0.1057                   | 0.8311                           | 1.0459                            | -0.0100               | 10.04      | 2.02       | 1.04        | 6.73      | 2.15      |
| AlCl | 0.0674                   | 0.2354                           | 1.2336                            | -0.0179               | 10.04      | 2.02       | 1.14        | 6.71      | 10.03     |
| AlBr | 0.0591                   | 0.1898                           | 1.3476                            | -0.0187               | 10.03      | 2.02       | 1.11        | 7.00      | 27.21     |
| AlI  | 0.0516                   | 0.0529                           | 1.5940                            | -0.0193               | 10.03      | 2.02       | 1.15        | 7.10      | 44.40     |
| GaF  | 0.1209                   | 0.6610                           | 1.1934                            | -0.0396               | 27.25      | 2.39       | 0.01        | 7.72      | 2.14      |
| GaCl | 0.0834                   | 0.1750                           | 1.4044                            | -0.0297               | 27.34      | 2.36       | 1.12        | 6.73      | 10.02     |
| GaBr | 0.0726                   | 0.1029                           | 1.4951                            | -0.0252               | 27.24      | 2.35       | 1.13        | 7.02      | 27.38     |
| GaI  | 0.0614                   | 0.0444                           | 1.6497                            | -0.0206               | 27.38      | 2.33       | 1.18        | 7.21      | 44.46     |
| InF  | 0.0977                   | 0.4910                           | 1.1556                            | -0.0226               | 45.34      | 2.22       | 0.89        | 6.77      | 2.15      |
| InCl | 0.0694                   | 0.1724                           | 1.2851                            | -0.0172               | 44.66      | 2.20       | 1.07        | 6.68      | 10.02     |
| InBr | 0.0611                   | 0.2735                           | 1.3298                            | -0.0146               | 45.52      | 2.21       | 0.93        | 6.85      | 27.63     |
| InI  | 0.0522                   | 0.0689                           | 1.4174                            | -0.0123               | 45.39      | 2.24       | 1.14        | 7.76      | 44.28     |
| TlF  | 0.0910                   | 0.4063                           | 1.1630                            | -0.0197               | 76.74      | 2.00       | 1.48        | 5.89      | 2.14      |
| TlCl | 0.0666                   | 0.1612                           | 1.2651                            | -0.0145               | 76.68      | 1.70       | 1.70        | 5.97      | 10.02     |
| TlBr | 0.0593                   | 0.1182                           | 1.2943                            | -0.0123               | 76.85      | 1.67       | 1.14        | 6.77      | 27.36     |
| TlI  | 0.0513                   | 0.0757                           | 1.3580                            | -0.0105               | 76.88      | 1.65       | 2.01        | 6.02      | 44.37     |

**Note:** 'V', 'C', and 'B' indicate the average occupation numbers in the  $\chi_{\text{xc}}$  (Valence, Core, and Bonding) basins, respectively. ' $\rho_{\text{BCP}}$ ' denotes the electron density at the bond critical point. ' $\nabla^2\rho$ ' signifies the Laplacian evaluated at the bond critical point. ' $|V_{\text{BCP}}|/G_{\text{BCP}}$ ' represents the ratio of potential to kinetic energy density, also evaluated at the bond critical point.

**Table S5:** Atomic partial charges ( $q$ ) for  $[\text{AeX}]^-$ , Ae = Be-Ba and X = F calculated at CCSD(T)/def2-QZVPP.

| EX     | QTAIM          |               | Hirshfeld      |               | CM5            |               |
|--------|----------------|---------------|----------------|---------------|----------------|---------------|
|        | $q(\text{Ae})$ | $q(\text{X})$ | $q(\text{Ae})$ | $q(\text{X})$ | $q(\text{Ae})$ | $q(\text{X})$ |
| [BeF]- | 0.09           | -1.09         | -0.62          | -0.38         | -0.47          | -0.53         |
| [MgF]- | 0.01           | -1.01         | -0.47          | -0.53         | -0.37          | -0.63         |
| [CaF]- | 0.02           | -1.02         | -0.41          | -0.59         | -0.26          | -0.74         |
| [SrF]- | -0.07          | -0.93         | -0.46          | -0.54         | -0.30          | -0.70         |
| [BaF]- | -0.17          | -0.83         | -0.53          | -0.47         | -0.35          | -0.65         |

**Table S6:** Electron Density Properties in  $[\text{AeX}]^-$ , with Ae = Be-Ba and X = F, calculated at CCSD(T)/def2-QZVPP.

| EX     | $\rho_{\text{BCP}}$ a.u. | $\nabla^2\rho_{\text{BCP}}$ a.u. | $ V_{\text{BCP}} /G_{\text{BCP}}$ | $H_{\text{BCP}}$ a.u. | $C(\text{Ae})$ a.u. | $V(\text{Ae})$ a.u. | $B(\text{Ae,X})$ a.u. | $V(\text{X})$ a.u. | $C(\text{X})$ a.u. |
|--------|--------------------------|----------------------------------|-----------------------------------|-----------------------|---------------------|---------------------|-----------------------|--------------------|--------------------|
| [BeF]- | 0.1194                   | 1.1873                           | 0.9871                            | +0.0038               | 2.04                | 2.00                | 1.78                  | 6.03               | 2.15               |
| [MgF]- | 0.0670                   | 0.5885                           | 0.9296                            | +0.0097               | 10.04               | 1.96                | 1.42                  | 6.40               | 2.15               |
| [CaF]- | 0.0822                   | 0.5143                           | 1.0613                            | -0.0084               | 17.96               | 1.90                | 1.94                  | 5.87               | 2.15               |
| [SrF]- | 0.0733                   | 0.3975                           | 1.0657                            | -0.0069               | 35.33               | 1.88                | 1.27                  | 6.51               | 2.15               |
| [BaF]- | 0.0737                   | 0.3459                           | 1.1381                            | -0.0134               | 52.45               | 1.87                | 1.35                  | 6.31               | 2.12               |

**Note:** 'V', 'C', and 'B' indicate the average occupation numbers in the  $\chi_{\text{xc}}$  (Valence, Core, and Bonding) basins, respectively. ' $\rho_{\text{BCP}}$ ' denotes the electron density at the bond critical point. ' $\nabla^2\rho$ ' signifies the Laplacian evaluated at the bond critical point. ' $|V_{\text{BCP}}|/G_{\text{BCP}}$ ' represents the ratio of potential to kinetic energy density, also evaluated at the bond critical point.

**Table S7:** Atomic partial charges (q) for EX, E = B-Tl and X = F calculated at CCSD(T)/def2-QZVPP.

| EX  | QTAIM |       | Hirshfeld |       | CM5  |       |
|-----|-------|-------|-----------|-------|------|-------|
|     | q(E)  | q(X)  | q(E)      | q(X)  | q(E) | q(X)  |
| BF  | 0.94  | -0.94 | 0.10      | -0.10 | 0.04 | -0.04 |
| AlF | 0.95  | -0.95 | 0.34      | -0.34 | 0.32 | -0.32 |
| GaF | 0.80  | -0.80 | 0.38      | -0.38 | 0.39 | -0.39 |
| InF | 0.81  | -0.81 | 0.44      | -0.44 | 0.47 | -0.47 |
| TlF | 0.79  | -0.79 | 0.49      | -0.49 | 0.52 | -0.52 |

**Table S8:** Electron Density Properties in EX systems, with E = B-Tl and X = F, calculated at CCSD(T)/def2-QZVPP.

| EX  | $\rho_{\text{BCP}}$ a.u. | $\nabla^2\rho_{\text{BCP}}$ a.u. | $ V_{\text{BCP}} /G_{\text{BCP}}$ | $H_{\text{BCP}}$ a.u. | C(E) a.u. | V(E) a.u. | B(E,X) a.u. | V(X) a.u. | C(X) a.u. |
|-----|--------------------------|----------------------------------|-----------------------------------|-----------------------|-----------|-----------|-------------|-----------|-----------|
| BF  | 0.2361                   | 1.5783                           | 1.3278                            | -0.1925               | 2.05      | 2.08      | 1.65        | 6.07      | 2.14      |
| AlF | 0.1026                   | 0.8997                           | 1.0225                            | -0.0052               | 10.05     | 1.97      | 1.07        | 6.75      | 2.14      |
| GaF | 0.1184                   | 0.7069                           | 1.1855                            | -0.0402               | 27.53     | 2.22      | 0.06        | 7.74      | 2.14      |
| InF | 0.0950                   | 0.5276                           | 1.1403                            | -0.0215               | 44.87     | 2.04      | 0.82        | 6.93      | 2.14      |
| TlF | 0.0891                   | 0.4306                           | 1.1597                            | -0.0204               | 76.71     | 1.69      | 1.36        | 6.34      | 2.14      |

**Note:** 'V', 'C', and 'B' indicate the average occupation numbers in the  $\chi_{\text{xc}}$  (Valence, Core, and Bonding) basins, respectively. ' $\rho_{\text{BCP}}$ ' denotes the electron density at the bond critical point. ' $\nabla^2\rho$ ' signifies the Laplacian evaluated at the bond critical point. ' $|V_{\text{BCP}}|/G_{\text{BCP}}$ ' represents the ratio of potential to kinetic energy density, also evaluated at the bond critical point.
